# Supplementary material for: TLR-stimulated IRAKM activates caspase-8 inflammasome in microglia and promotes neuroinflammation
Source: JCI journal article supplement (doi:10.1172/jci121901), 2018-10-29
Supplement: sd1 [file 1]

Supplemental Table 1

**Clinical characteristics of MS patients and controls.**

| Cases | Gender | age | Clinical diagnosis        | Lesion         |
|-------|--------|-----|---------------------------|----------------|
| MS389 | F      | 55  | Secondary progressive MS  | Chronic active |
| MS402 | M      | 46  | Secondary progressive MS  | Chronic active |
| MS403 | F      | 54  | Secondary progressive MS  | Chronic acute  |
| MS404 | F      | 55  | Secondary progressive MS  | Acute active   |
| MS406 | M      | 62  | Secondary progressive MS  | Acute active   |
| MS407 | F      | 44  | Secondary progressive MS  | Acute active   |
| MS408 | M      | 39  | Secondary progressive MS  | Acute active   |
| MS410 | F      | 47  | Secondary progressive MS  | Acute active   |
| MS411 | M      | 61  | Secondary progressive MS  | Acute active   |
| MS416 | M      | 55  | Secondary progressive MS  | Acute active   |
| MS418 | M      | 56  | Secondary progressive MS  | Acute acute    |
| C075  | M      | 88  | urinary infection, COPD   | Control        |
| C073  | M      | 71  | Liver Cancer              | Control        |
| C072  | M      | 77  | Pneumonia, ischemic bowel | Control        |
| C036  | M      | 68  | Myocardial infarcts       | Control        |
| C044  | F      | 67  | Acute arrhythmia          | Control        |
| C067  | F      | 67  | Metastatic ovarian cancer | Control        |
| C054  | M      | 66  | pancreatic cancer         | Control        |

Supplemental Fig. 1

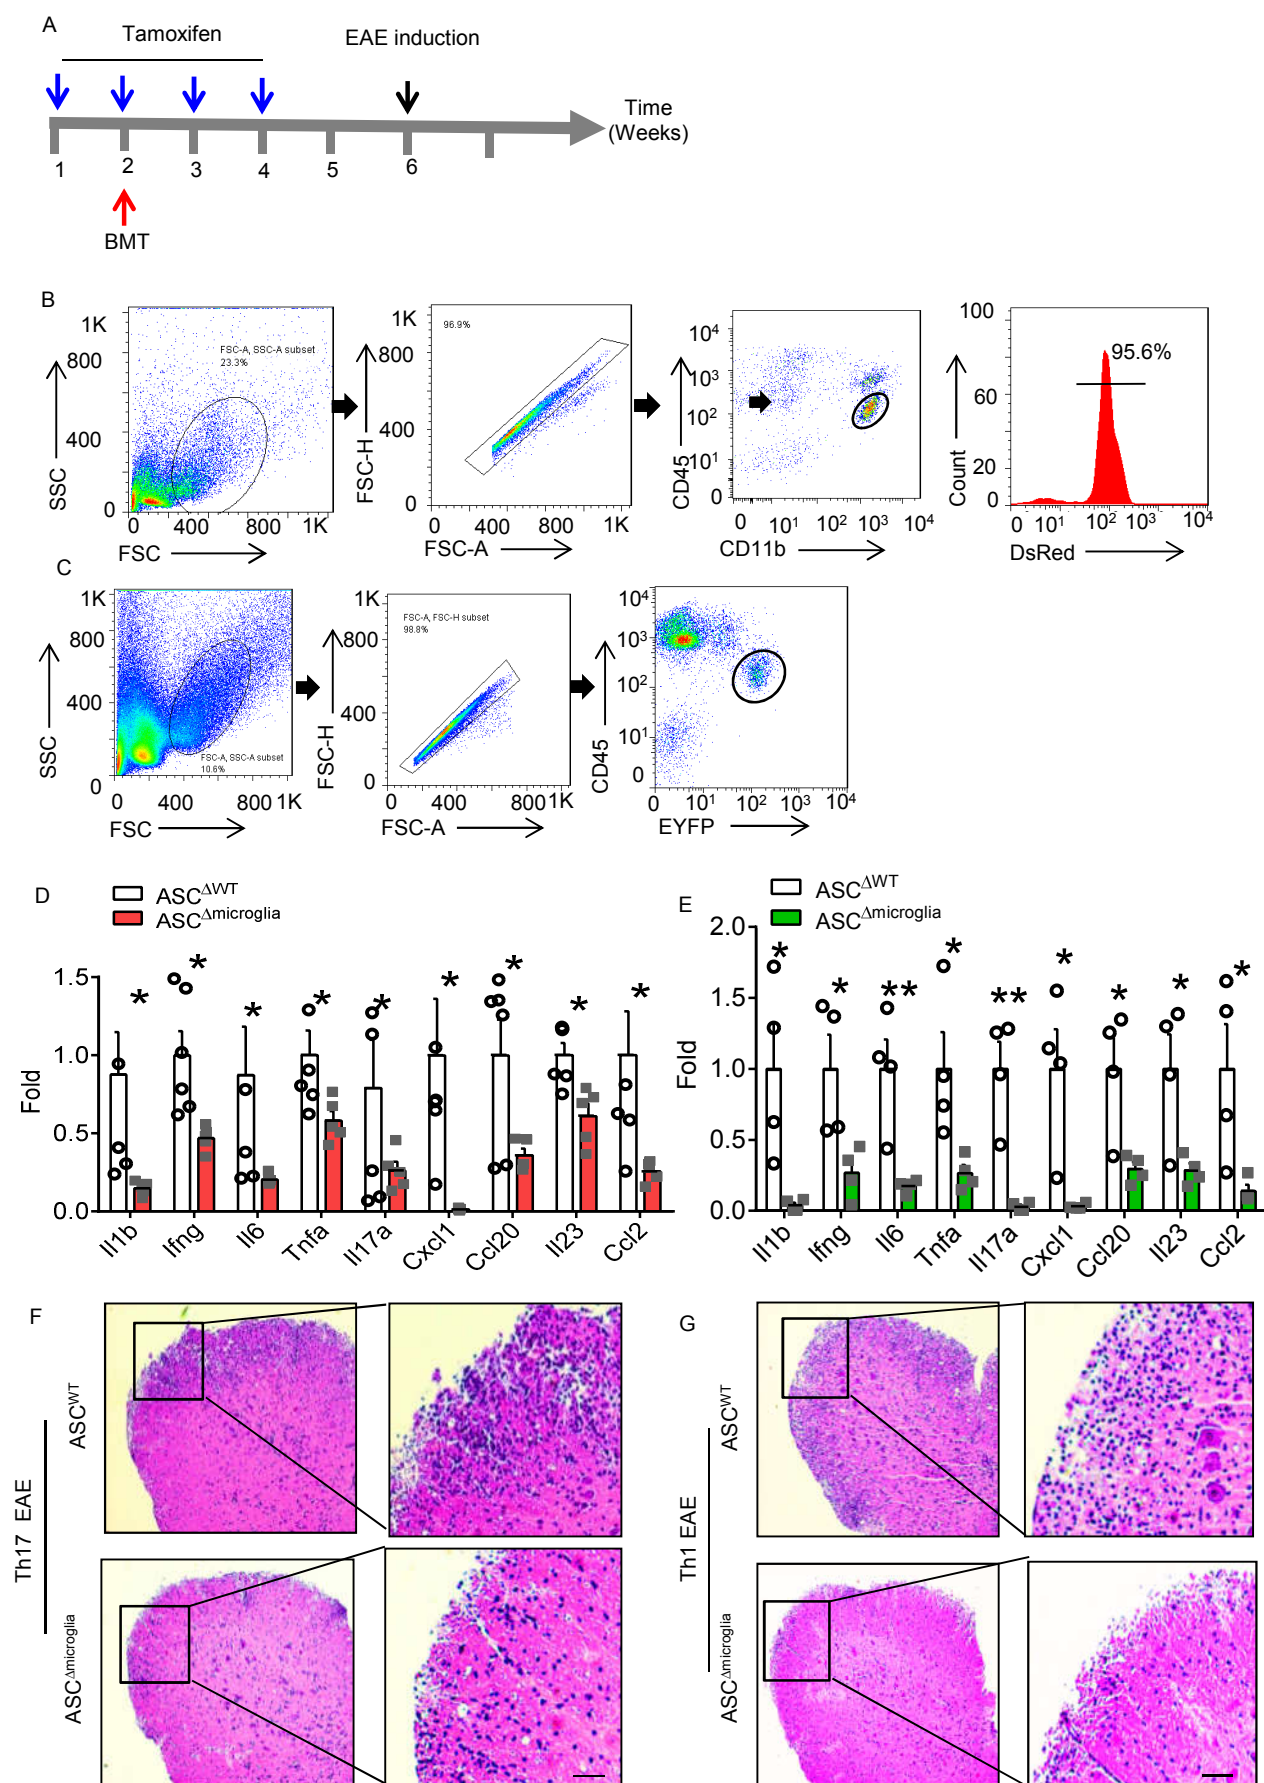

Supplemental Fig. 2

Casp8 Peptide Sequences detected by Mass  
Spectrometry

1. DCFICCILSHGDK
2. FLCLDYIPHK
3. TMLAENNLETLK
4. WDLLVNFLDCNR

Supplemental Fig. 3

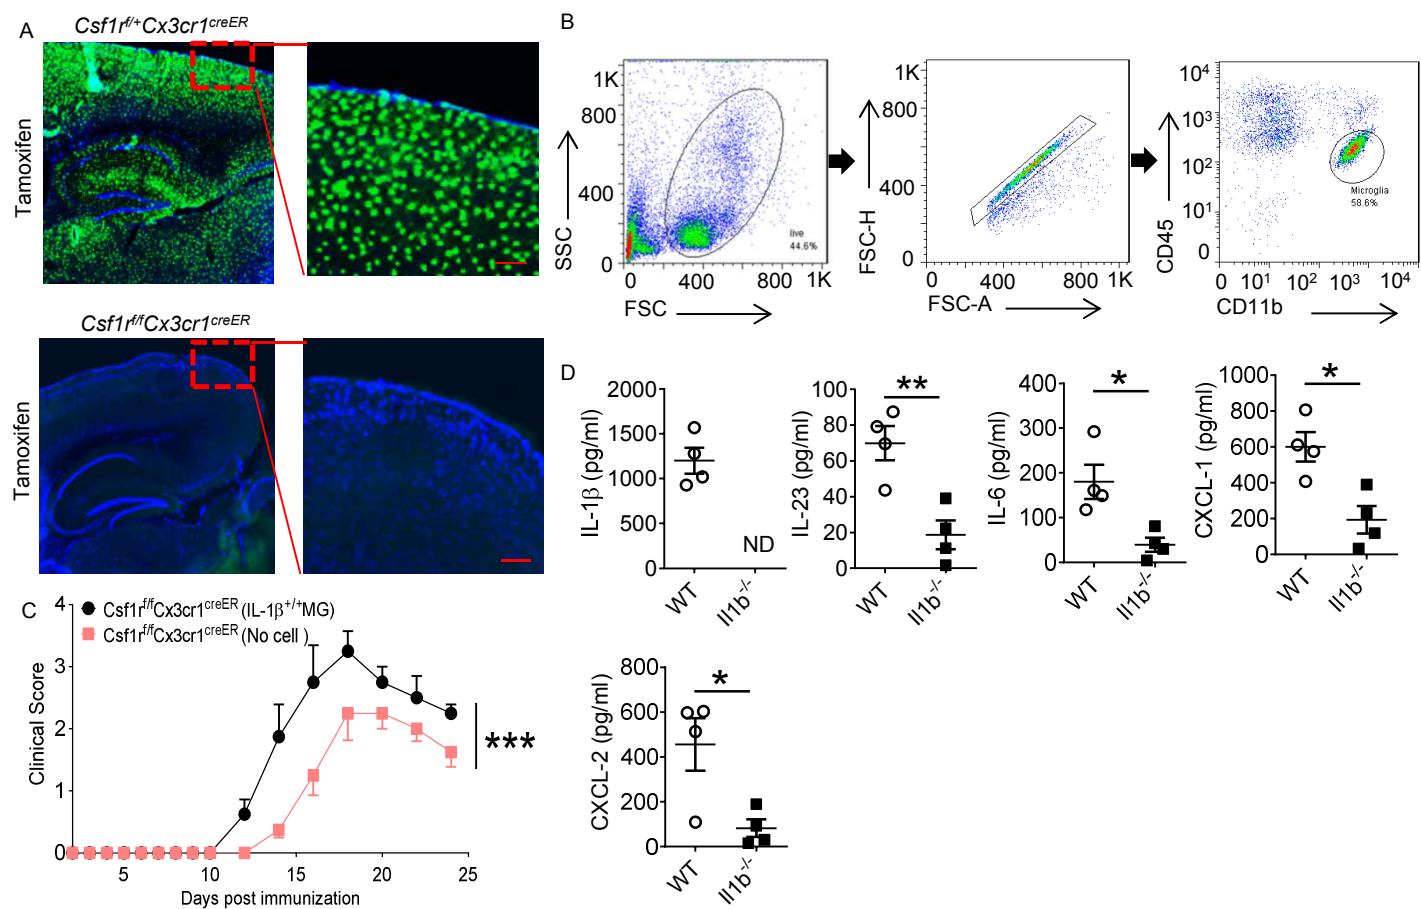

## Supplemental Figure Legends

**Supplemental Figure 1. Microglia intrinsic ASC promote both Th17 and Th1 induced EAE.** Analysis of results for WT→*Asc<sup>fl/+</sup>Cx3cr1<sup>Cre-ER</sup>* (ASC<sup>ΔWT</sup>) and WT→*Asc<sup>fl/fl</sup>Cx3cr1<sup>Cre-ER</sup>* (ASC<sup>Δmicroglia</sup>) bone marrow chimera mice in EAE disease. **(A)** Schematic diagram of tamoxifen treatment, bone marrow transplantation and EAE induction. **(B)** Analysis of efficiency of Cre recombinase in microglia of *Asc<sup>fl/+</sup>Cx3cr1<sup>Cre-ER</sup>Rosa26-stop-DsRed* mice. **(C)** Gating strategy of EYFP<sup>+</sup> microglia during EAE disease. **(D and E)** Inflammatory gene expression in the lumbar spinal cords as assessed at the peak of disease induce by Th17 (D, N=6/group) or Th1 (E, N=5/group) transfer. **(F and G)** H&E staining of lumbar spinal cords harvested at the peak of disease. Scale Bar, 100 μm. Data are representative of two independent experiments; Mean ± SEM. \*P < 0.05, \*\*P < 0.01 (unpaired two-tailed *t*-test).

**Supplemental Figure 2. IRAKM physically interacts with caspase-8.** **(A)** Mass spectrometry analysis of IRAKM-associated proteins after immunoprecipitation via anti-IRAKM beads from cell lysates and four matched peptide sequences that correspond to caspase-8 were detected.

**Supplemental Figure 3. Characterization of IL-1b KO microglia.** **(A)** Tamoxifen was administered to *Csf1<sup>fl/fl</sup>Cx3cr1<sup>Cre</sup>* mice at 5 mg/mouse by i.p for consecutive four weeks (1 time/week) followed by DAPI staining and microscope analysis of microglia cells deletion. EYFP indicates microglia cells and Blue indicates nuclear. Scale Bar, 400 μm. **(B)** Gating strategy of microglia from WT and *Il1b<sup>-/-</sup>* donor mice. **(C)** *Csf1<sup>fl/fl</sup>Cx3cr1<sup>Cre</sup>* mice were treated with tamoxifen and transferred with or without wild-type microglia after the fourth tamoxifen injection. N=6/group. **(D)** ELISA analysis of inflammatory cytokines and chemokines in the supernatant of primary microglia isolated from EAE brain at peak disease. N=4/group. Data are representative of two independent experiments; Mean ± SEM.
